# Supplementary material for: Feasibility and acceptability of brief individual interpersonal psychotherapy among university students with mental distress in Ethiopia
Source: BMC Psychol. 2021 Apr 27;9:64. doi: 10.1186/s40359-021-00570-1 (PMC8077191; doi:10.1186/s40359-021-00570-1)
Supplement: Supplementary file 2 — Additional file 2. Treatment adherence and dose. [file 40359_2021_570_MOESM2_ESM.docx]

**Title of the manuscript:** Feasibility and Acceptability of Brief Individual Interpersonal Psychotherapy among University Students with Mental Distress in Ethiopia

**Author list:** Assegid Negash12*, Matloob AhmedKhan1, Girmay Medhin3, Dawit Wondimagegn1, Clare Pain4 and Mesfin Araya1

1Department of Psychiatry, College of Health Sciences, School of Medicine, Addis Ababa University, Addis Ababa, Ethiopia

* Correspondence: [assegidn@gmail.com](mailto:assegidn@gmail.com)

2Department of Psychology, College of Education and Behavioral Sciences, Wolaita Sodo University, Wolaita Sodo, Ethiopia

3Aklilu Lemma Institute of Pathobiology, Addis Ababa University, Addis Ababa, Ethiopia

4Department of Psychiatry, University of Toronto, Canada

Treatment adherence and dose

| Items | Session 1 | | Session 2 | | Session 3 | | Session 4 | | Session 5 | | Session 6 | | Session 7 | | Session 8 | |
| --- | --- | --- | --- | --- | --- | --- | --- | --- | --- | --- | --- | --- | --- | --- | --- | --- |
| Yes | No | Yes | No | Yes | No | Yes | No | Yes | No | Yes | No | Yes | No | Yes | No |
| Did you administer IPT-E screening tool and TTF? | 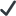 |  | 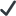 |  |  |  |  |  |  |  |  |  |  |  |  |  |
| Did you discuss psycho-social stressors which occurred around the same time as the symptoms started or worsened? |  |  | 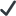 |  | 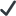 |  |  |  |  |  |  |  |  |  |  |  |
| Did you ask about people in the patient’s life who may be helpful to them now? |  |  | 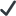 |  | 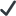 |  |  |  |  |  |  |  |  |  |  |  |
| Did you discuss the goal of treatment? |  |  | 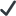 |  | 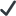 |  |  |  |  |  |  |  |  |  |  |  |
| Did you discuss details of communication interactions or social role expectations in close relationships? |  |  |  |  | 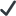 |  | 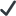 |  | 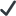 |  | 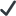 |  | 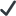 |  |  |  |
| Did you use open questions andreflective, empathic statements to improve the patient’s experience of feeling understood by you? |  |  | 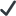 |  | 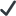 |  | 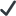 |  | 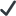 |  | 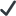 |  | 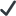 |  | 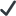 |  |
| Did you discuss ways to find or use people as social supports? |  |  |  |  | 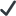 |  | 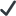 |  | 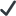 |  | 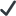 |  | 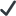 |  |  |  |
| For grief, did you explore the events of the death, the relationship with the dead person, or ways to cope with the loss? |  |  |  |  | 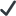 |  | 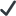 |  | 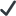 |  | 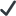 |  | 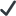 |  |  |  |
| For role transitions did you explore the challenges of the patient’s new social role & what’s changed? |  |  |  |  | 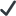 |  | 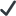 |  | 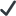 |  | 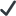 |  | 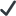 |  |  |  |
| For disputes, did you explore the relationship with the disputed other; the issues in the disagreement; and identify problems and alternative ways to resolve misunderstandings? |  |  |  |  | 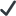 |  | 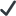 |  | 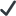 |  | 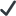 |  | 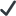 |  |  |  |
| Did you review the patient’s experience of treatment? |  |  |  |  |  |  |  |  |  |  |  |  |  |  |  | 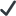 |
| Did you discuss contingency plan in which the patient returns to the counseling office if they experience a relapse? |  |  |  |  |  |  |  |  |  |  |  |  |  |  |  | 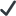 |
| Did you ask if the patient have any worries or feelings about concluding treatment? |  |  |  |  |  |  |  |  |  |  |  |  |  |  |  | 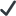 |
